# Supplementary material
Source: PubMed Central journal article supplement (PMC5732839)
Supplement: NIHMS913715-supplement-6.pdf [file NIHMS913715-supplement-6.pdf]

# Figure S6

**A)**

CATATGGGTTTCGTCTCACCATCATCATCACCACTCGTCGGGTCTGGAAGTCCTGTTTCAAGGTCCGCAC  
 ATGGAAG AAGCGAGCAAACGTTCTATCAGTTCTGGGATACCCAAACCGGTTCCGAAACTGGGTGAAGT  
 GGTAAACACGCATGGCCCGGTGCAACCCGACAAAGATAATATTCGCCAGGAACCGTACACCCTGCCGC  
 AAGGTTTTACGTGGGACGCACTGATCTGGGTGACCGTGGCGTGTGAAAGAACTGTATACCCTGCTG  
 AACGAAAACACGTTGAAGATGACGATAACATGTTTCGCTTCGATTATAGCCCGGAATTTCTGCTGTG  
 GGCTCTGCGTCCGCCGGTTGGCTGCCGAGTGGCATTGCGGCGTTCGTGTCTGAGCAGCCGTAAAC  
 TGGTCGTTTTATTTCAGCAATCCCGGCTAACATTCATATCTACGATACCGAAAAGAAAATGGTCGAA  
 ATCAATTTCTGTGTGTGCACAAAAACTGCGTTCGAAACGCGTTGCCCGGTCCTGATTCGCGAAATC  
 ACGCGTCGCGTGCACCTGGAAGGCATCTTTCAGGCGGTTTATACCGCCGGTGTGTCCTGCGCAACCC  
 GGTGGGCACGTGCCGTTACTGATCGCATCGCAGCCTGAACCCGCGTAAACTGATGAAAGTTAAATTCAC  
 ACCTGTGCGTAATATGACCATGCAGCGCACGATGAACTGTATCGTCTGCCGGAACCCCGAAAACG  
 GCCGGCTGCGTCCGATGGAACCAAAGATATCCCGGTGGTTTATCAGCTGCTGACCCGTTATCTGAA  
 ACAATTTACCTGACGCCGGTGTATGCTCAGGAAGAAGTTGAACTTGTGTTTACCCGCAAGAAACA  
 TTATCGATACCTTCGTCGTGAAAACGC AAATGGTGAAGTACGACATTTCTGAGTTTCTACACCCTGC  
 CGTCCACGATTATGAACCATCCGACCCACAAATCACTGAAAGCGGCCATTTCGTTTTACAATGTGCAC  
 ACCCAGACGCCGCTGCTGATCTGATGAGTACGCACTGGTCTGGCTAAAATGAAAGGCTTTGATGT  
 GTTCAACGCGCTGGACCTGATGGAAAACAAAACCTTTCGGA AAAACTGAAATTCGGCATGGTGTGATG  
 GCAACCTGC AATAT TACCTGTATAACTGGAATGCCCGTCAATGGGTGCCGAAAAGTGGGTCTGTT  
 CTGCAATAAGGATCC

**B)**

**Human NMT1**

MADESETAVKPPAPPLPQMMEGNGNGHEHCSDCENEEDNSYNRGGLSPANDTGAKK KKKKQ KKKK EKG  
 SETDS AQDQPVKMN SLPAERIQEIQK AIELFSV GQGP AKT MEEASKRS YQFWD TQVPKLG E VV NTHG PVE  
 PDKDNIRQEPY TLPQGFTW DALDLGDRGV LKEL Y TLL NENY VEDDDNMFRFDYSPE FLL WALRPPG WLPQ  
 WHCG V R V V S S R K L V G F I S A I P A N I H I Y D T E K K M V E I N F L C V H K K L R S K R V A P V L R E I T R R V H L E G I F Q A V Y T  
 A G V V L P K P V G T C R Y W H R S L N P R K L I E V K F S H L S R N M T M Q R T M K L Y R L P E T P K T A G L R P M E T K D I P V V H Q L  
 L T R Y L K Q F H L T P V M S Q E E V E H W F Y P Q E N I I D T F V V E N A N G E V I D F L S F Y T L P S T I M N H P T H K S L K A A Y S F Y N  
 V H T Q T P L L D L M S D A L V L A K M K G F D V F N A L D L M E N K T F L E K L K F G I G D G N L Q Y Y L Y N W K C P S M G A E K V G  
 L V L Q

**NMT1 purification**

MGS SHHHHHHSSGLEVL FQGP H MEEASKRS YQFWD TQVPKLG E V V NTHG PVEPDKDNIRQEPY TLPQGF  
 TWDALDLGDRGV LKEL Y TLL NENY VEDDDNMFRFDYSPE FLL WALRPPG WLPQWHCG V R V V S S R K L V G  
 F I S A I P A N I H I Y D T E K K M V E I N F L C V H K K L R S K R V A P V L R E I T R R V H L E G I F Q A V Y T A G V V L P K P V G T C R Y W  
 H R S L N P R K L I E V K F S H L S R N M T M Q R T M K L Y R L P E T P K T A G L R P M E T K D I P V V H Q L L T R Y L K Q F H L T P V M S Q  
 E E V E H W F Y P Q E N I I D T F V V E N A N G E V I D F L S F Y T L P S T I M N H P T H K S L K A A Y S F Y N V H T Q T P L L D L M S D A L  
 V L A K M K G F D V F N A L D L M E N K T F L E K L K F G I G D G N L Q Y Y L Y N W K C P S M G A E K V G L V L Q

**C)**

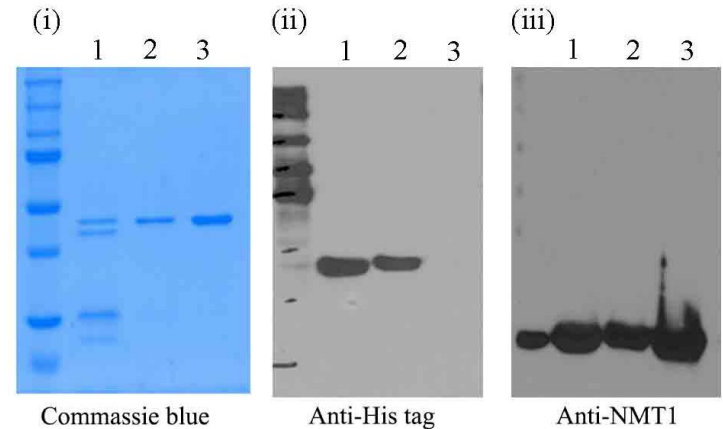

- 1. NMT1-His-tag (Ni-NTA)
- 2. NMT1-His-tag (Anion-exchange)
- 3. NMT1 without His-tag (Anion-exchange)

# Figure S7

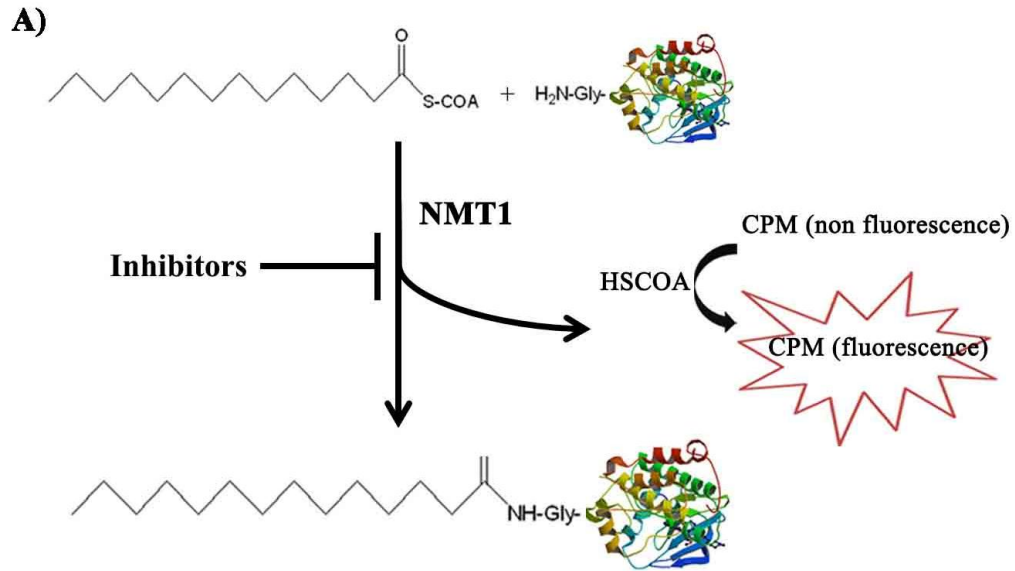

**B)**

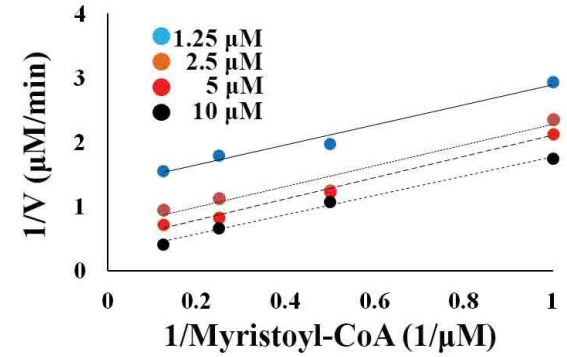

| Peptide concentration ( $\mu\text{M}$ ) | $K_m$ ( $\mu\text{M}$ ) | $V_{\text{max}}$ | $K_m/V_{\text{max}}$ |
|-----------------------------------------|-------------------------|------------------|----------------------|
| 1.25                                    | 0.86                    | $1.33 \pm 0.09$  | $1.54 \pm 0.17$      |
| 2.5                                     | 0.41                    | $0.67 \pm 0.15$  | $1.59 \pm 0.26$      |
| 5                                       | 0.28                    | $0.46 \pm 0.05$  | $1.64 \pm 0.09$      |
| 10                                      | 0.17                    | $0.26 \pm 0.04$  | $1.50 \pm 0.07$      |
