# Supplementary material
Source: PubMed Central journal article supplement (PMC5732839)

# Figure S1

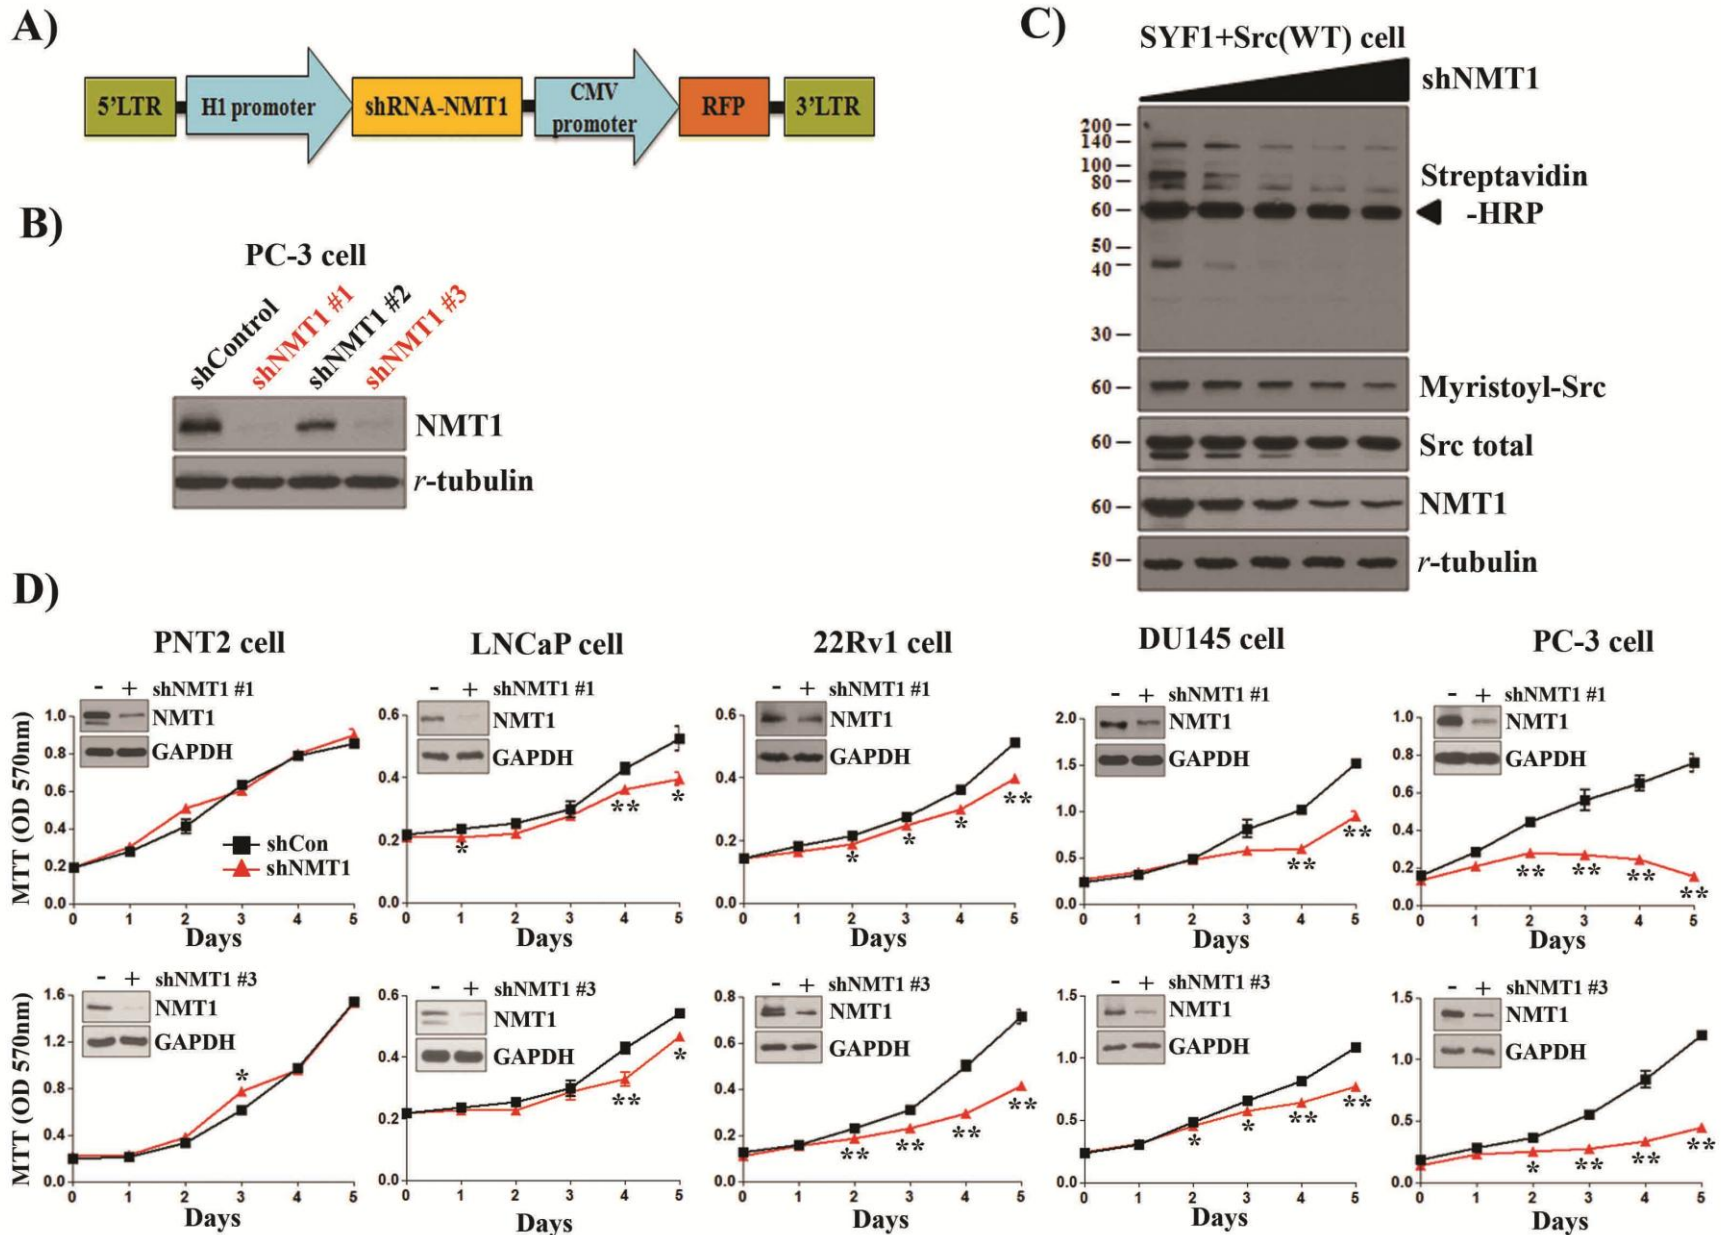

# Figure S2

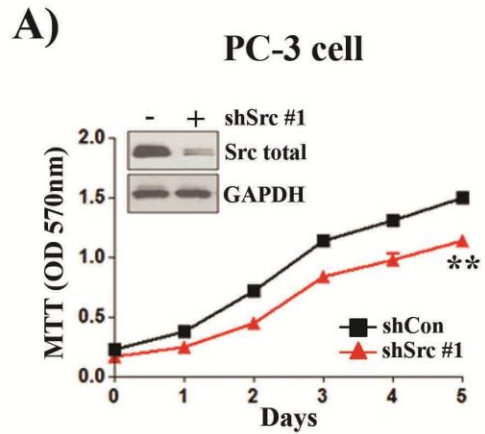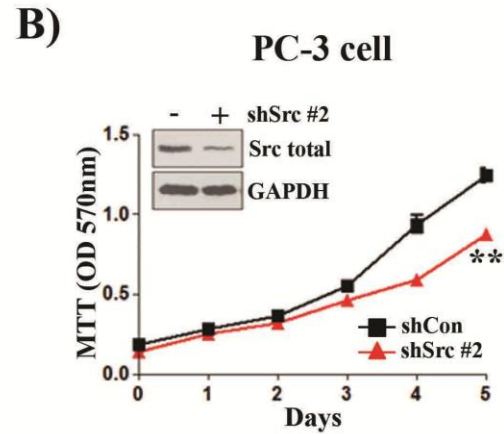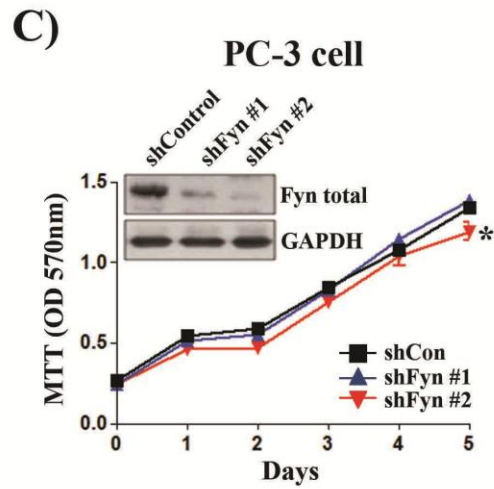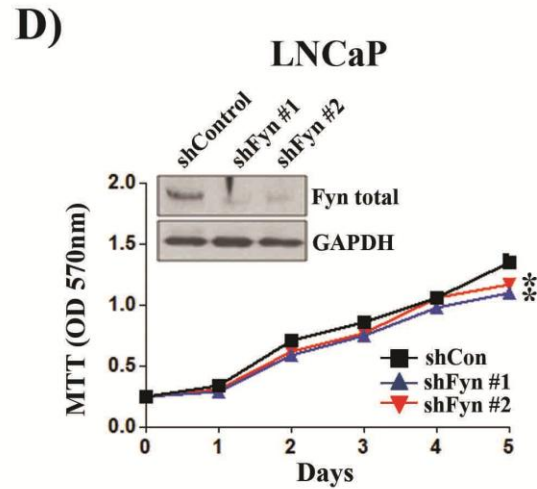

**Figure S3**

**A)**

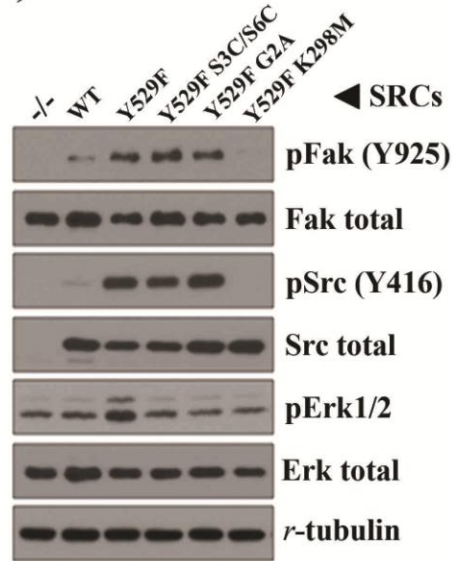

**C)**

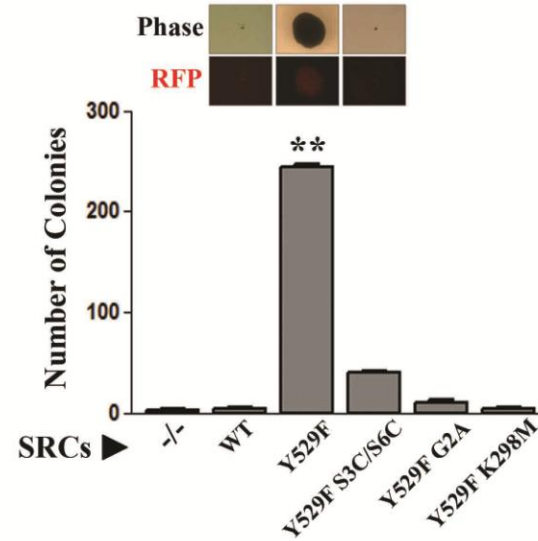

**B)**

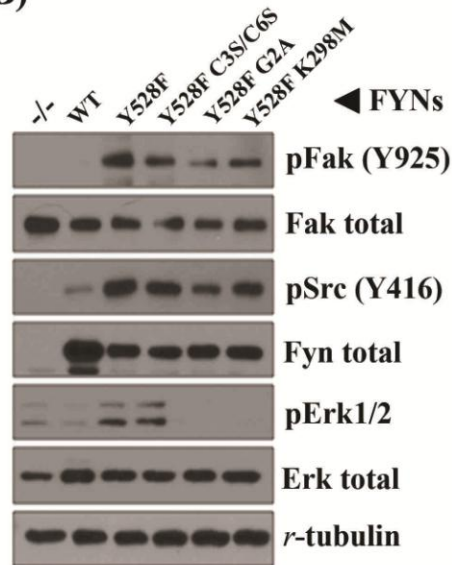

**D)**

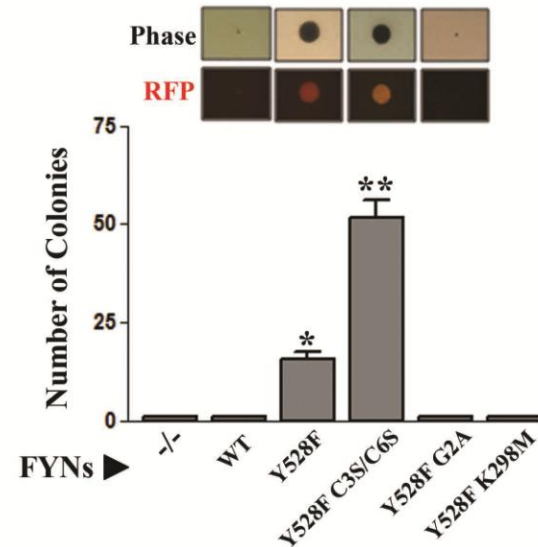

**Figure S4**

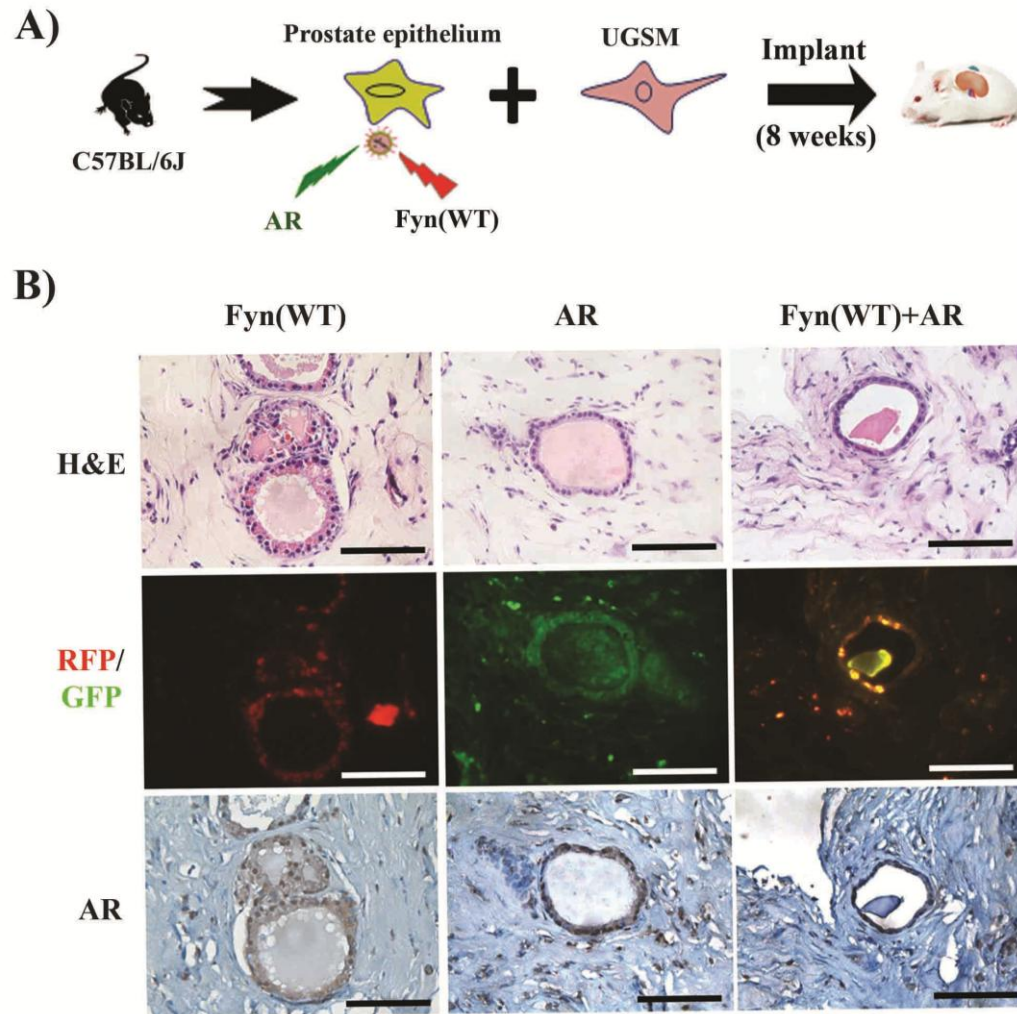

Supplement: NIHMS913715-supplement-4.pdf [file NIHMS913715-supplement-4.pdf]

**Figure S5**

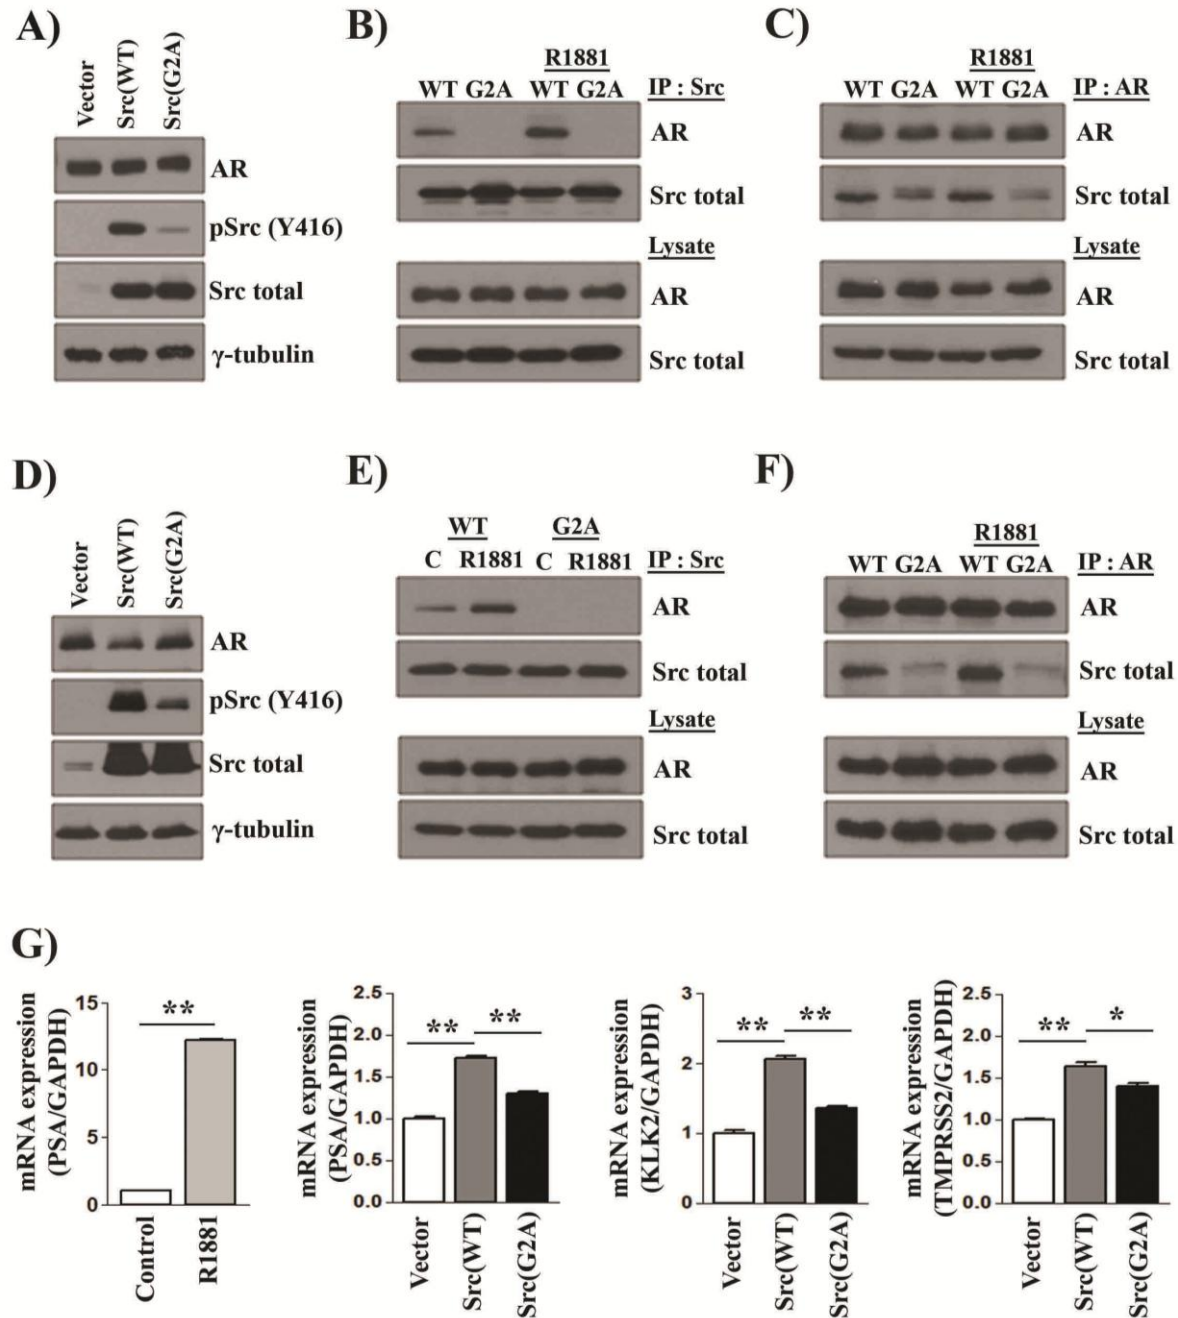

Supplement: NIHMS913715-supplement-5.pdf [file NIHMS913715-supplement-5.pdf]

# Figure S8

A)

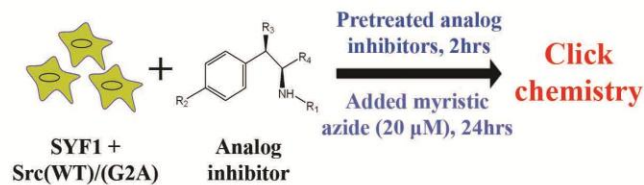

B)

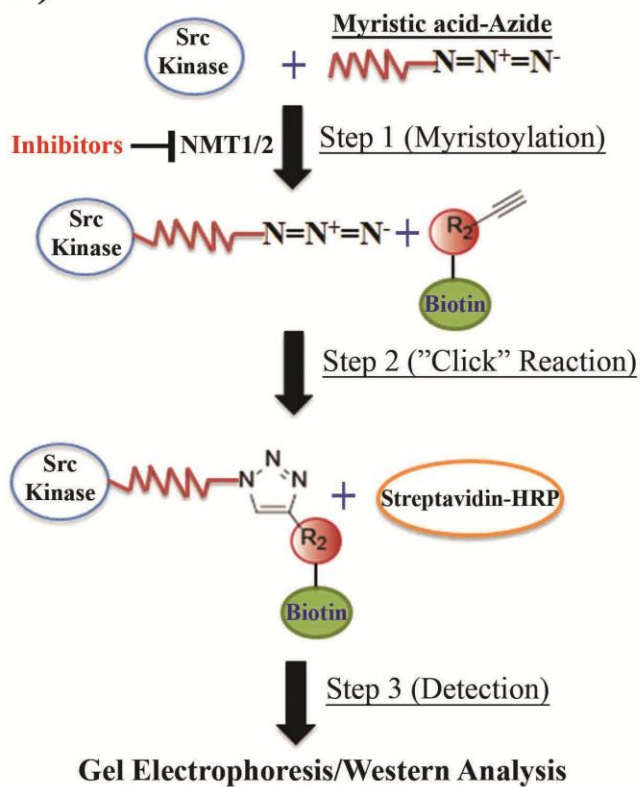

C)

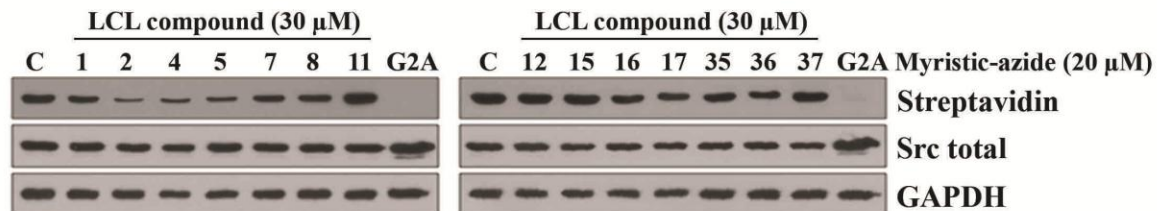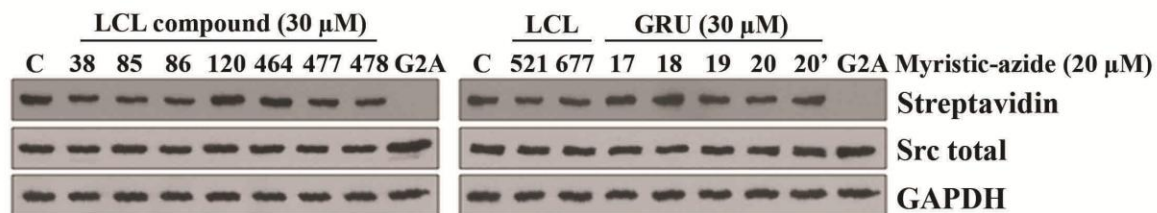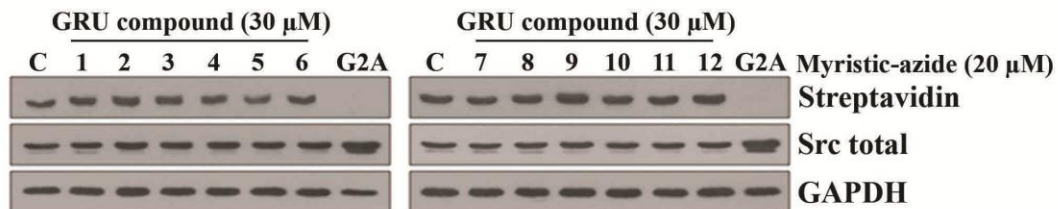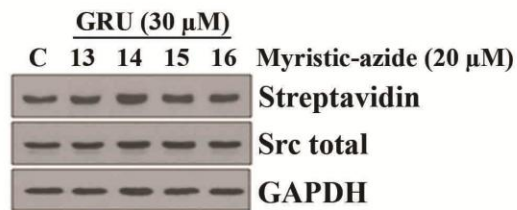

# Figure S9

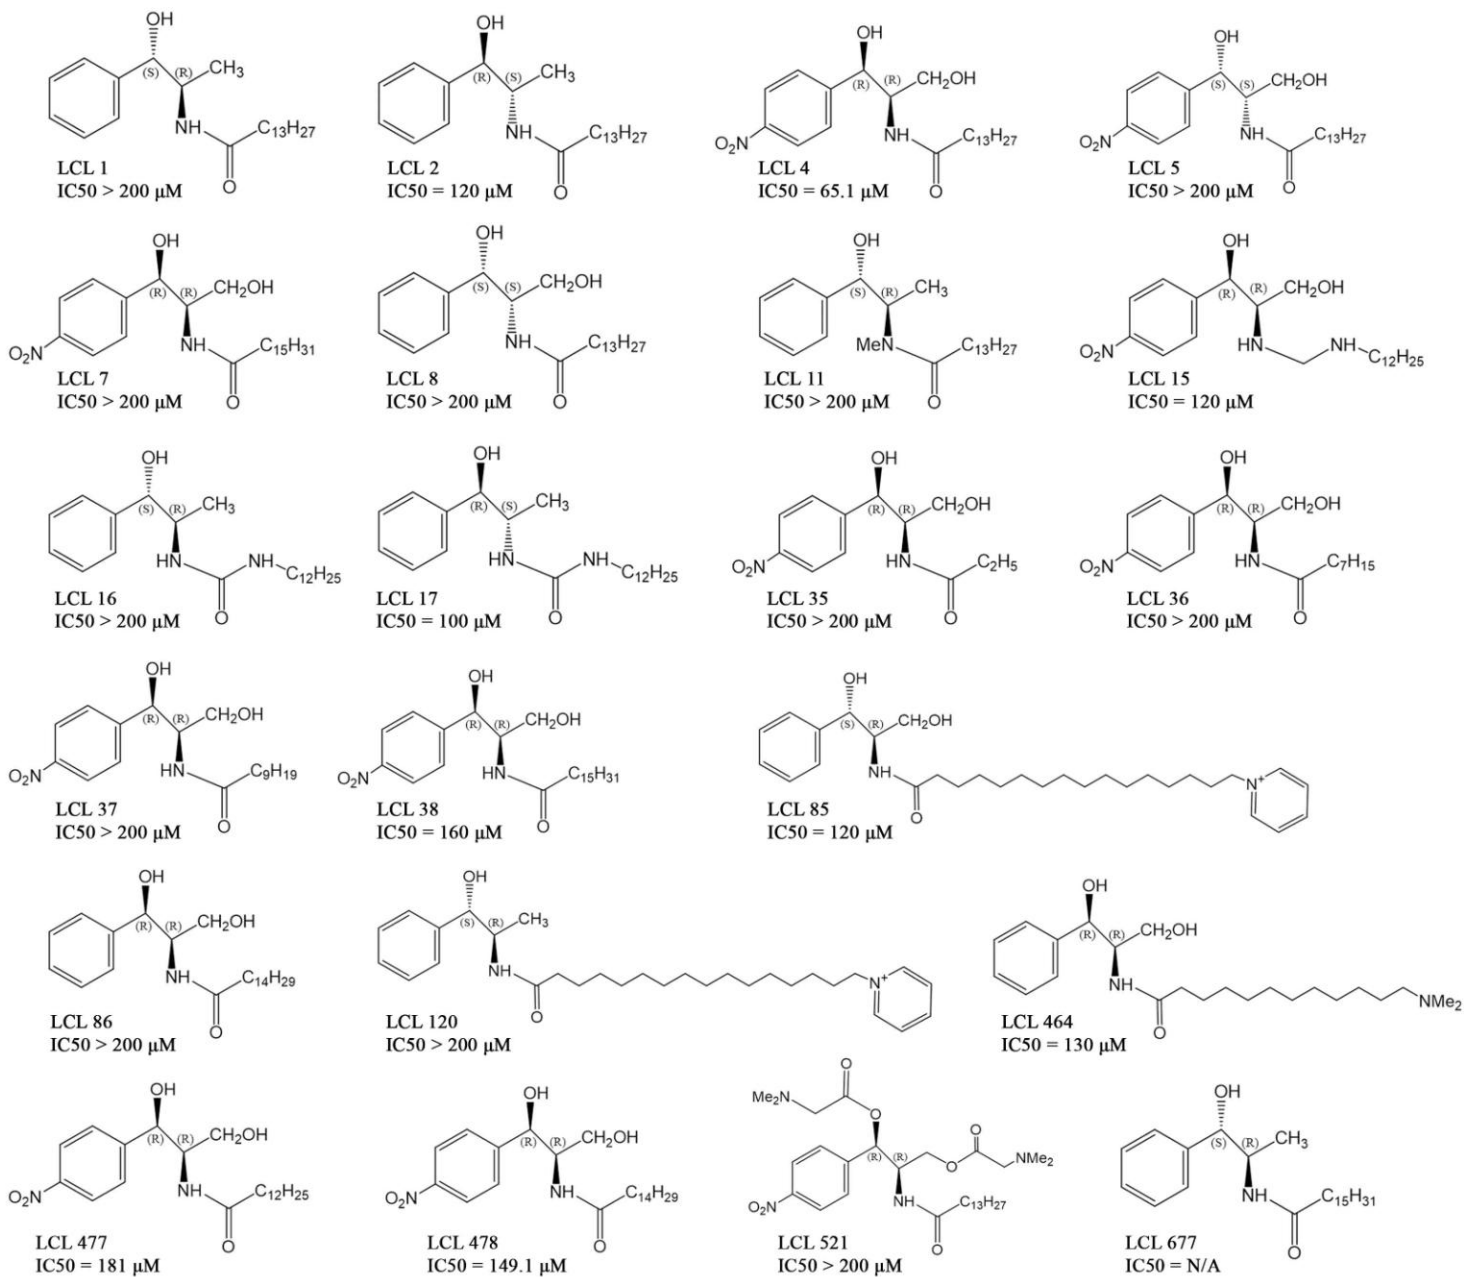

# Figure S9-continued

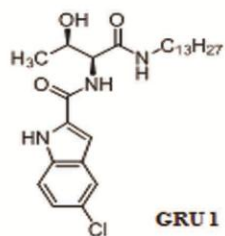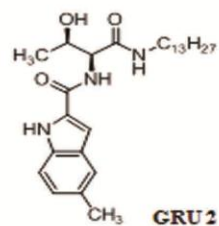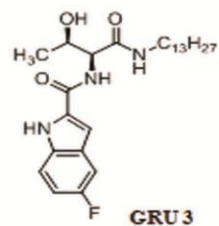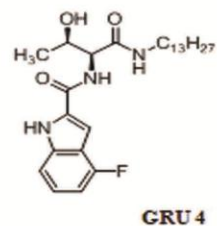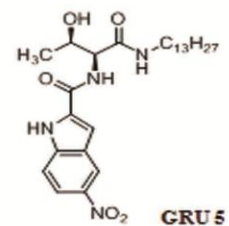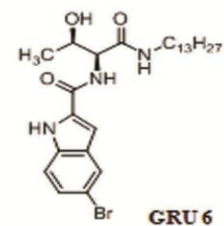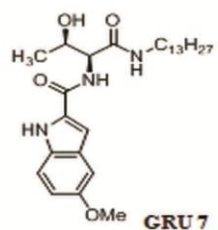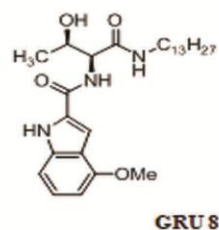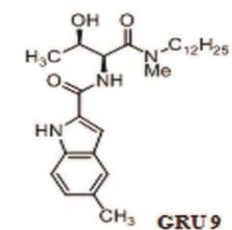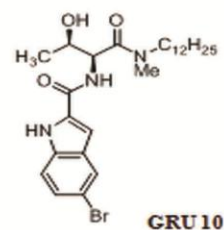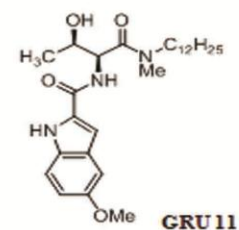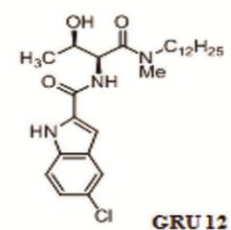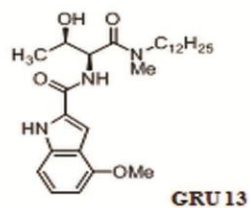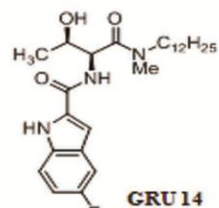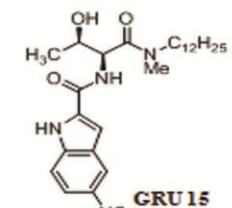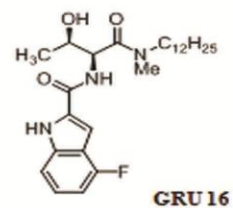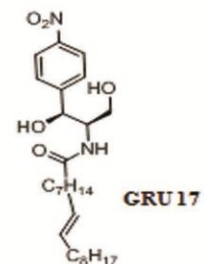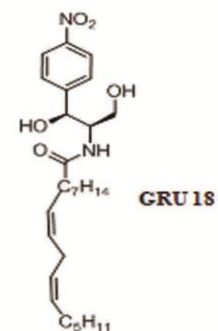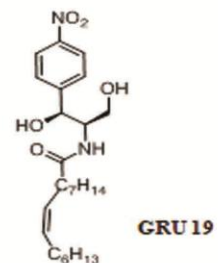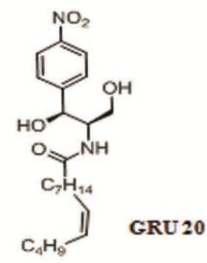

# Figure S10

A)

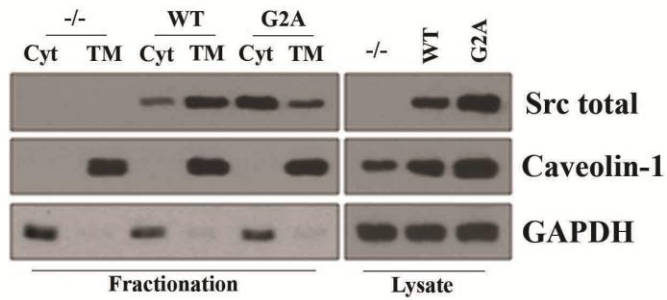

B)

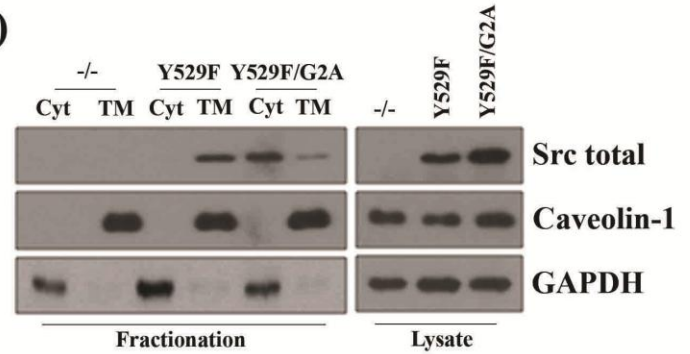

C)

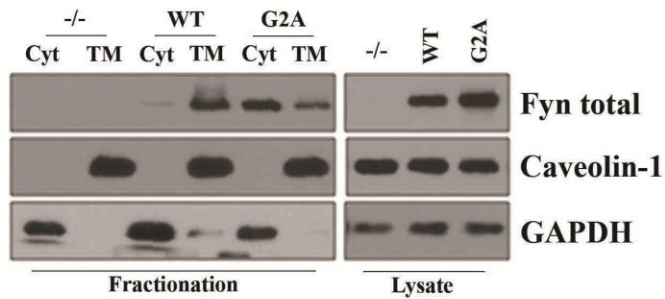

D)

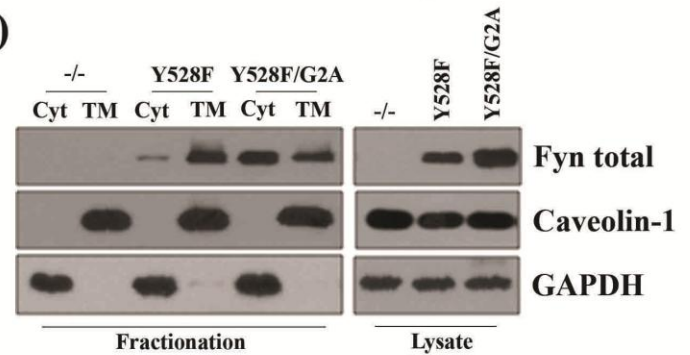

E)

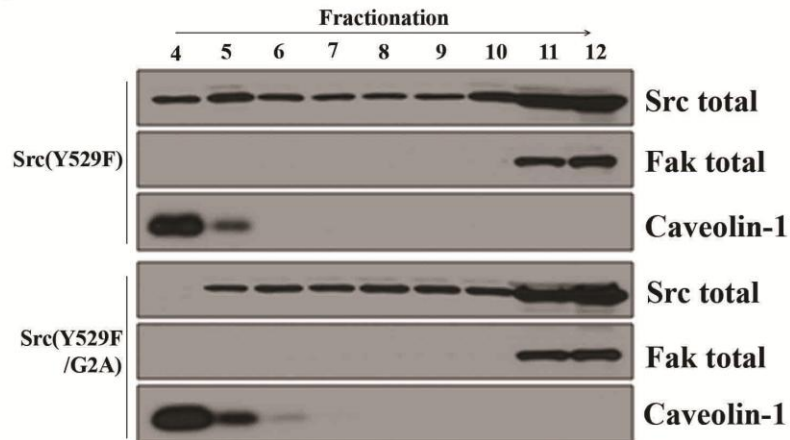

Supplement: NIHMS913715-supplement-7.pdf [file NIHMS913715-supplement-7.pdf]

# Figure S11

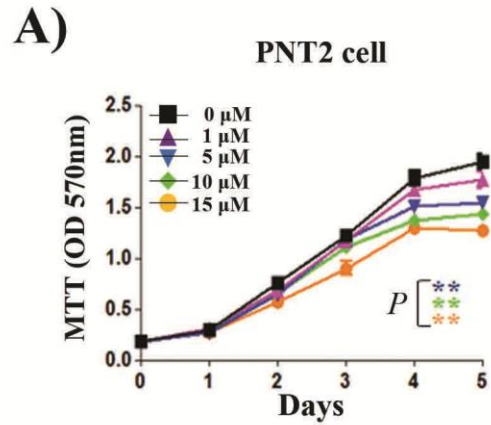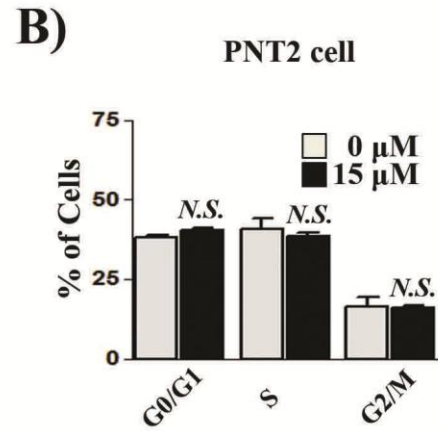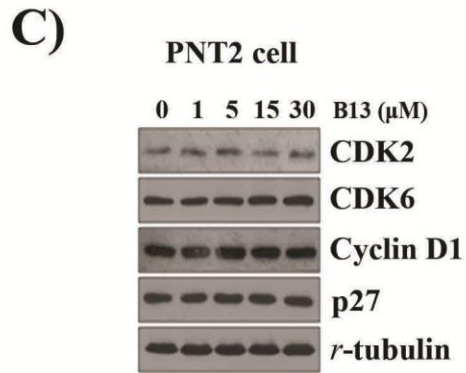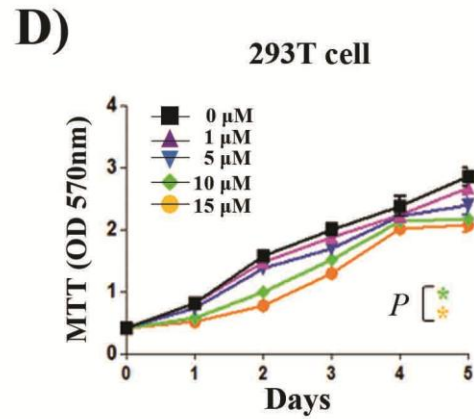

**Figure S12**

**A)**

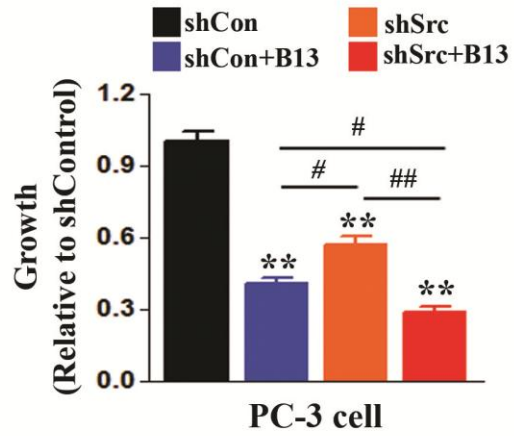

**B)**

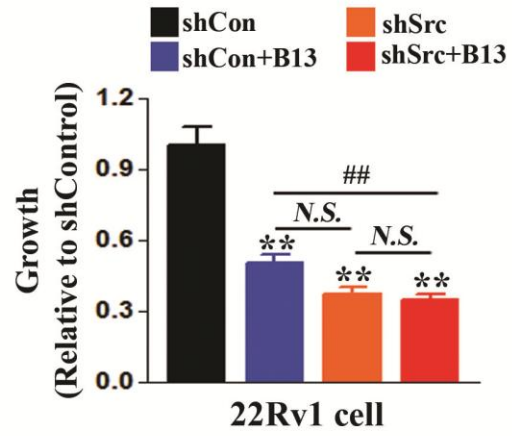

**Figure S13**

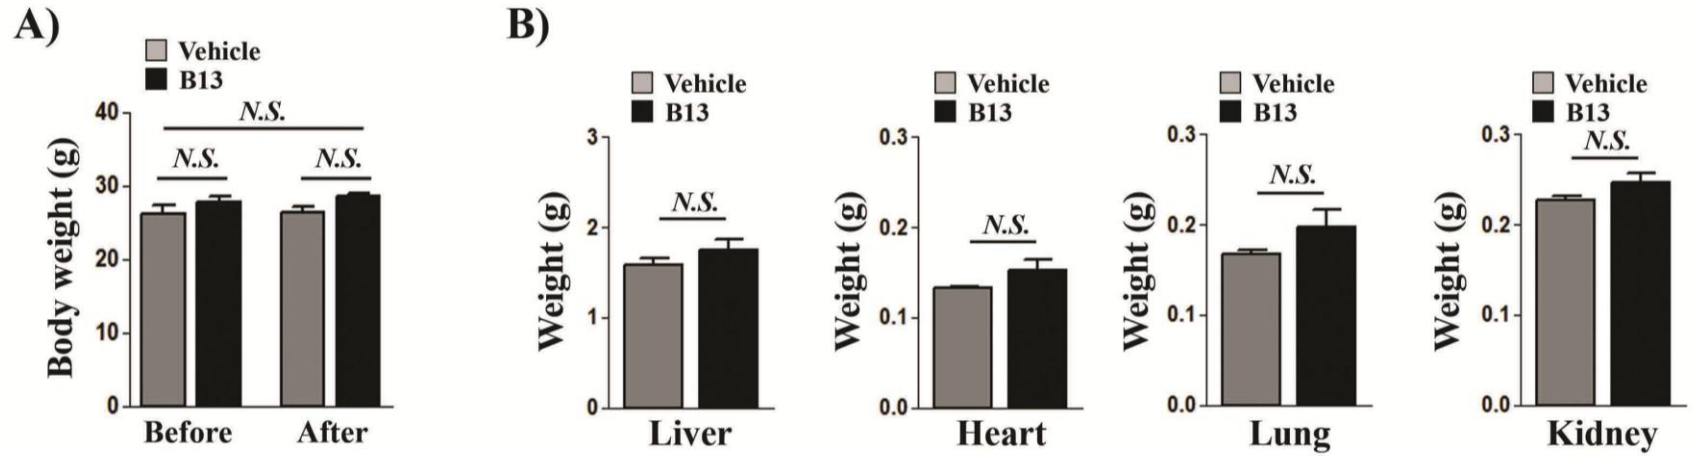

Supplement: NIHMS913715-supplement-8.pdf [file NIHMS913715-supplement-8.pdf]
